# Supplementary material
Source: PubMed Central journal article supplement (PMC4970662)

## Supplemental information

### Laboratory Studies

Cell based assay (CBA) was performed with an in-house test at Hospital Clinic, whereas the Erasmus Medical Center used a commercially available test (Euroimmun, Lübeck, Germany). For both tests, fixed human embryonic kidney 293 cells had been transfected with cDNA encoding Caspr2 protein. The in-house test was performed with serum diluted 1:40 and CSF 1:5, and Alexa Fluor 488 goat anti-human IgG (1:1000; Invitrogen) to detect bound IgG. Dilutions for the commercial CBA were serum 1:10 and CSF undiluted, with fluorescein isothiocyanate (FITC)-conjugated goat-anti-human IgG to detect bound IgG, according to manufacturer's instructions. Serum IgG subtyping was performed using CBA and FITC conjugated sheep anti-human IgG1 (1:400) or IgG4 (1:1000) as secondary antibodies (The Binding Site, Birmingham, England). All assays were examined with a fluorescence microscope by two of the investigators.

IHC was performed according to similar protocols in both laboratories. In brief, paraformaldehyde fixed rat brain was prepared as previously reported(1), and 7 µm thick sagittal sections were serially incubated with 0,3% H<sub>2</sub>O<sub>2</sub> for 15 minutes, 5% goat serum for 60 minutes, and overnight with patient's serum (1:200) or CSF (1:2) at 4°C. Subsequently, sections were incubated with biotinylated goat anti-human IgG, avidin-biotin peroxidase and the reactivity developed with diaminobenzidine. IHC was considered positive if a previously reported neuropil staining pattern characteristic of Caspr2 antibodies was identified.(2)

Sera were tested for VGKC-complex antibodies with radioimmunoassay (RIA) in the Erasmus Medical Center, using  $^{125}\text{I}$ - $\alpha$ -dendrotoxin labeled VGKC extracts of mammalian brain, according to the manufacturer's instructions (DLD Diagnostika GmbH, Hamburg, Germany). Results were expressed as picomoles of  $^{125}\text{I}$ - $\alpha$ -dendrotoxin binding sites precipitated per liter of serum, corrected for mean results of control samples. Samples < 50 pM were considered negative. All samples > 50 pM were tested twice. Results ranging from 50 to 100 pM were inconclusive, results > 100 pM were considered positive.

#### Reference List

- (1) Ances BM, Vitaliani R, Taylor RA, et al. Treatment-responsive limbic encephalitis identified by neuropil antibodies: MRI and PET correlates. *Brain* 2005 Aug;128:1764-1777.
- (2) Lancaster E, Huijbers MG, Bar V, et al. Investigations of caspr2, an autoantigen of encephalitis and neuromyotonia. *Ann Neurol* 2011 Feb;69:303-311.

Table e-1: Caspr2 core symptoms in 38 patients with confirmed Caspr2 antibodies

|    | Gender | Age | Subacute onset | No. symptoms present | No. symptoms documented | CNS | Cerebellar | PNH | Autonomic | Insomnia | Pain | Weight loss |
|----|--------|-----|----------------|----------------------|-------------------------|-----|------------|-----|-----------|----------|------|-------------|
| 1  | M      | 69  | No             | 6                    | 7                       |     |            |     |           |          |      |             |
| 2  | F      | 53  | Yes            | 6                    | 7                       |     |            |     |           |          |      |             |
| 3  | M      | 77  | No             | 6                    | 7                       |     |            |     |           |          |      |             |
| 4  | M      | 74  | No             | 6                    | 7                       |     |            |     |           |          |      |             |
| 5  | F      | 45  | No             | 6                    | 7                       |     |            |     |           |          |      |             |
| 6  | F      | 45  | No             | 5                    | 5                       |     |            |     |           |          |      |             |
| 7  | M      | 68  | No             | 5                    | 6                       |     |            |     |           |          |      |             |
| 8  | M      | 71  | Yes            | 5                    | 6                       |     |            |     |           |          |      |             |
| 9  | M      | 62  | Yes            | 5                    | 7                       |     |            |     |           |          |      |             |
| 10 | M      | 69  | No             | 5                    | 7                       |     |            |     |           |          |      |             |
| 11 | M      | 74  | No             | 5                    | 7                       |     |            |     |           |          |      |             |
| 12 | M      | 54  | Yes            | 5                    | 7                       |     |            |     |           |          |      |             |
| 13 | M      | 68  | No             | 4                    | 5                       |     |            |     |           |          |      |             |
| 14 | M      | 68  | No             | 4                    | 7                       |     |            |     |           |          |      |             |
| 15 | M      | 66  | No             | 4                    | 7                       |     |            |     |           |          |      |             |
| 16 | M      | 62  | No             | 4                    | 7                       |     |            |     |           |          |      |             |
| 17 | M      | 61  | No             | 4                    | 7                       |     |            |     |           |          |      |             |
| 18 | M      | 53  | Yes            | 4                    | 7                       |     |            |     |           |          |      |             |
| 19 | M      | 74  | Yes            | 4                    | 7                       |     |            |     |           |          |      |             |
| 20 | M      | 61  | No             | 3                    | 4                       |     |            |     |           |          |      |             |
| 21 | M      | 57  | Yes            | 3                    | 4                       |     |            |     |           |          |      |             |
| 22 | M      | 59  | No             | 3                    | 7                       |     |            |     |           |          |      |             |

|    |   |    |      |   |   |        |        |        |        |        |        |        |
|----|---|----|------|---|---|--------|--------|--------|--------|--------|--------|--------|
| 23 | M | 62 | Yes  | 3 | 7 | Green  | Green  | Orange | Orange | Orange | Orange | Green  |
| 24 | M | 76 | No   | 3 | 7 | Green  | Orange | Green  | Orange | Green  | Orange | Orange |
| 25 | M | 66 | No   | 3 | 7 | Green  | Orange | Orange | Green  | Orange | Green  | Orange |
| 26 | M | 40 | No   | 3 | 7 | Green  | Orange | Orange | Orange | Green  | Orange | Green  |
| 27 | M | 74 | No   | 2 | 3 | Green  | Green  | Orange | Grey   | Grey   | Grey   | Grey   |
| 28 | M | 25 | Yes  | 2 | 3 | Grey   | Grey   | Green  | Orange | Grey   | Green  | Grey   |
| 29 | M | 72 | Yes  | 2 | 5 | Green  | Orange | Orange | Grey   | Grey   | Orange | Green  |
| 30 | M | 60 | Yes  | 2 | 7 | Green  | Orange | Orange | Orange | Orange | Green  | Orange |
| 31 | M | 72 | N.A. | 1 | 7 | Green  | Orange | Orange | Orange | Orange | Orange | Orange |
| 32 | M | 68 | Yes  | 2 | 7 | Green  | Orange | Orange | Orange | Green  | Orange | Orange |
| 33 | M | 75 | Yes  | 1 | 6 | Green  | Orange | Orange | Orange | Grey   | Orange | Orange |
| 34 | M | 74 | No   | 2 | 7 | Green  | Orange | Orange | Orange | Orange | Green  | Orange |
| 35 | M | 62 | No   | 1 | 6 | Green  | Orange | Orange | Orange | Grey   | Orange | Orange |
| 36 | F | 58 | Yes  | 1 | 4 | Green  | Orange | Orange | Grey   | Orange | Grey   | Grey   |
| 37 | M | 67 | N.A. | 1 | 4 | Orange | Grey   | Grey   | Orange | Grey   | Green  | Orange |
| 38 | M | 58 | No   | 1 | 3 | Green  | Orange | Orange | Grey   | Grey   | Grey   | Grey   |

Subacute onset = progression to maximum disease severity in three months

Green = symptom present. Orange= symptom absent. Grey striped = symptom not documented.

**Table e-2: Symptoms and diagnosis in 10 patients with antibodies detected only with CBA (without confirmation with brain IHC)**

|    | M/F | Age | Subacute onset | No. symptoms present | No. symptoms documented | CNS    | Cerebellar   | PNH          | Autonomic    | Insomnia     | Pain         | Weight loss  | Final diagnosis or clinical description  |
|----|-----|-----|----------------|----------------------|-------------------------|--------|--------------|--------------|--------------|--------------|--------------|--------------|------------------------------------------|
| 1  | M   | 83  | No             | 4                    | 7                       | Green  | Green        | Orange       | Green        | Green        | Orange       | Orange       | Creutzfeldt Jakob disease                |
| 2  | F   | 28  | No             | 3                    | 7                       | Orange | Orange       | Green        | Orange       | Green        | Green        | Orange       | Cramp fasciculation syndrome             |
| 3  | M   | 56  | Yes            | 2                    | 2                       | Green  | Grey striped | Grey striped | Grey striped | Green        | Grey striped | Grey striped | Autoimmune encephalopathy                |
| 4  | M   | 63  | No             | 2                    | 6                       | Green  | Grey striped | Orange       | Orange       | Orange       | Orange       | Green        | Encephalopathy with hypokinetic rigidity |
| 5  | M   | 78  | No             | 2                    | 7                       | Green  | Green        | Orange       | Orange       | Orange       | Orange       | Orange       | Creutzfeldt Jakob disease                |
| 6  | F   | 62  | Yes            | 1                    | 2                       | Green  | Grey striped | Orange       | Grey striped | Grey striped | Grey striped | Grey striped | Psychiatric symptoms                     |
| 7  | F   | 37  | Yes            | 1                    | 2                       | Green  | Grey striped | Grey striped | Orange       | Grey striped | Grey striped | Grey striped | Neuro-SLE                                |
| 8  | F   | 83  | Yes            | 1                    | 2                       | Green  | Grey striped | Grey striped | Grey striped | Grey striped | Orange       | Grey striped | Episodic cognitive disturbance           |
| 9  | M   | 62  | No             | 1                    | 7                       | Green  | Orange       | Orange       | Orange       | Orange       | Orange       | Orange       | Limbic encephalitis                      |
| 10 | M   | 78  | No             | 1                    | 7                       | Green  | Orange       | Orange       | Orange       | Orange       | Orange       | Orange       | Limbic encephalitis                      |

Subacute onset = progression to maximum disease severity in three months

Green = symptom present. Orange= symptom absent. Grey striped = symptom not documented.

**Supplemental Figure e-1:** Flow chart showing inclusion for the study

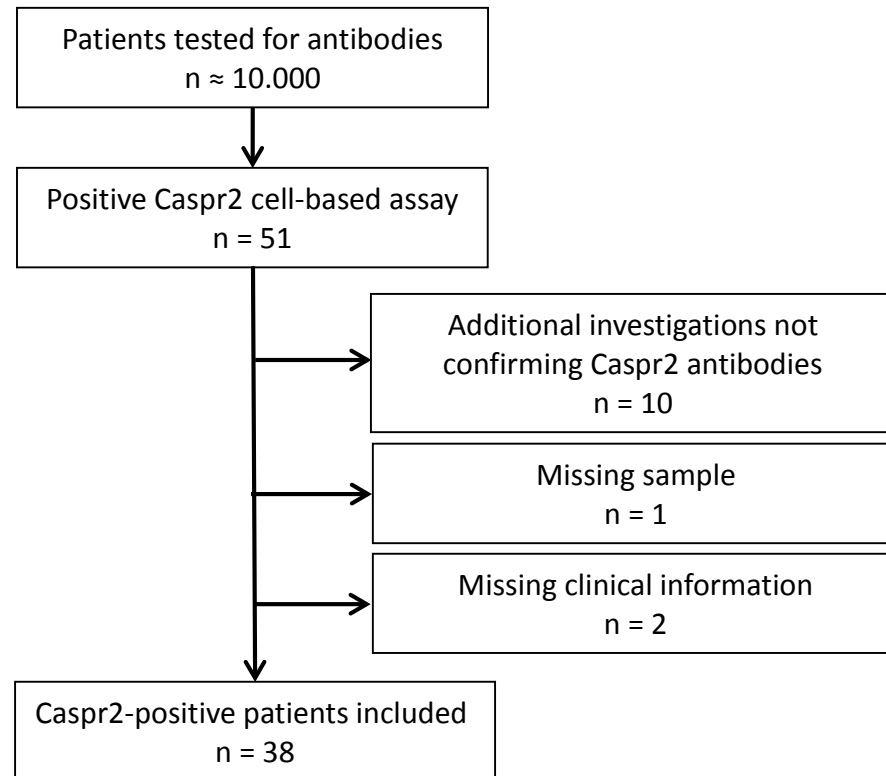

Supplement: supp_WNL.0000000000002917_Supplemental_data.pdf [file supp_WNL.0000000000002917_Supplemental_data.pdf]
